# Supplementary material for: Efficient degradation of organic pollutants by peroxymonosulfate activated with MgCuFe-layered double hydroxide
Source: Royal Society of Chemistry journal article supplement (doi:10.1039/c8ra09841g), 2019-01-01
Supplement: c8ra09841g1.pdf [file c8ra09841g1.pdf]

## Electronic Supplementary Information

### **Efficient degradation of organic pollutants by peroxymonosulfate activated with MgCuFe-layered double hydroxide**

Jianyao Zhu,<sup>ac</sup> Zhiliang Zhu,<sup>\*ac</sup> Hua Zhang,<sup>a</sup> Hongtao Lu<sup>a</sup> and Yanling Qiu<sup>bc</sup>

<sup>a</sup> *State Key Laboratory of Pollution Control and Resource Reuse, Tongji University, Shanghai 200092, China.*

<sup>b</sup> *Key Laboratory of Yangtze River Water Environment, Ministry of Education, Tongji University, Shanghai 200092, China.*

<sup>c</sup> *Shanghai Institute of Pollution Control and Ecological Security, Shanghai 200092, China.*

*\*Corresponding author. E-mail: zzl@tongji.edu.cn.*

**Table S1** Comparison between MgCuFe-LDH and the previously reported CuFe-oxide catalysts in catalytic performance.

| Catalyst dosage<br>(g/L)                                                                     | PMS<br>dosage | Pollutant                              | Removal<br>efficiency | Initial<br>solution<br>pH | Temperature<br>(°C) | References |
|----------------------------------------------------------------------------------------------|---------------|----------------------------------------|-----------------------|---------------------------|---------------------|------------|
| CuFe <sub>2</sub> O <sub>4</sub> magnetic<br>nanoparticles<br>(0.1)                          | 0.2<br>mM     | Tetrabromobisphenol A<br>(10 mg/L)     | 99%<br>(30 min)       | 8.2                       | 25                  | 1          |
| CuFeO <sub>2</sub><br>rhombohedral<br>crystals<br>(0.1)                                      | 33 μM         | Sulfadiazine<br>(8 μmol/L)             | ~100%<br>(24 min)     | 6.8                       | 25 ± 2              | 2          |
| Microscaled CuFeO <sub>2</sub><br>particles<br>(0.5)                                         | 0.2<br>mM     | Carbamazepine<br>(20 μmol/L)           | 100%<br>(30 min)      | 7.0                       | 25                  | 3          |
| Magnetic Cu <sup>0</sup> /Fe <sub>3</sub> O <sub>4</sub><br>submicron<br>composites<br>(0.1) | 0.5<br>mM     | Rhodamine B<br>(20 μmol/L)             | 100%<br>(15 min)      | 7.0                       | No data             | 4          |
|                                                                                              |               | Methylene blue<br>(20 μmol/L)          | 100%<br>(5 min)       |                           |                     |            |
|                                                                                              |               | Orange II<br>(20 μmol/L)               | 100%<br>(10 min)      |                           |                     |            |
|                                                                                              |               | Phenol<br>(0.1 mmol/L)                 | 100%<br>(30 min)      |                           |                     |            |
|                                                                                              |               | 4-Chlorophenol<br>(0.1 mmol/L)         | 100%<br>(15 min)      |                           |                     |            |
| Cu <sub>2</sub> O/α-Fe <sub>2</sub> O <sub>3</sub><br>(0.4)                                  | 40<br>mg/L    | Sulfamethoxazole<br>(1.6 mg/L)         | ~100%<br>(180 min)    | 6.8                       | 23 ± 2              | 5          |
| CuFe <sub>2</sub> O <sub>4</sub> /multi-walled<br>carbon nanotubes<br>(0.2)                  | 0.6<br>mM     | Trimethoprim<br>(0.02 mmol/L)          | ~90%<br>(24 min)      | 7.0                       | 27                  | 6          |
| CuFe <sub>2</sub> O <sub>4</sub> nanoparticles<br>(0.1)                                      | 0.2<br>mM     | 2,4,4'-Trichlorobiphenyl<br>(0.5 mg/L) | 89%<br>(8 h)          | 7.0                       | 25                  | 7          |
|                                                                                              |               | Acetaminophen<br>(5 mg/L)              | ~93.0%<br>(20 min)    | 6.0                       | 25                  | This work  |
| MgCuFe-LDH<br>(0.3)                                                                          | 0.5<br>mM     | Rhodamine B<br>(5 mg/L)                | 99.5%<br>(45 min)     | 5.2                       | 25                  |            |

## References

1. Y. Ding, L. Zhu, N. Wang and H. Tang, *Appl catal B*, 2013, **129**, 153-162.
2. Y. Feng, D. Wu, Y. Deng, T. Zhang and K. Shih, *Environ. Sci. Technol.*, 2016, **50**, 3119-3127.
3. Y. Ding, H. Tang, S. Zhang, S. Wang and H. Tang, *J. Hazard. Mater.*, 2016, **317**, 686-694.
4. G. Nie, J. Huang, Y. Hu, Y. Ding, X. Han and H. Tang, *Chinese Journal of Catalysis*, 2017, **38**, 227-239.
5. Y. Feng, C. Liao, H. Li, C. Liu and K. Shih, *Environ. Technol.*, 2018, **39**, 1-11.

6. J. Kong, R. Li, F. Wang, P. Chen, H. Liu, G. Liu and W. Lv, *Rsc Advances*, 2018, **8**, 24787-24795.
7. W. Qin, G. Fang, Y. Wang and D. Zhou, *Chem. Eng. J.*, 2018, **348**, 526-534.
